# Supplementary material
Source: PubMed Central journal article supplement (PMC4598305)

**Table of Contents**

|                                                                                            |         |
|--------------------------------------------------------------------------------------------|---------|
| 1. General materials .....                                                                 | S2      |
| 2. Cloning, expression and purification .....                                              | S2      |
| 3. Supplementary Figures and Tables                                                        |         |
| 3.2. Figure S1. Codon optimized sequence of AtmS14 .....                                   | S3      |
| 3.2. Table S1. NMR chemical shift values of <b>2-T</b> , <b>3-T</b> , and <b>4-T</b> ..... | S3      |
| 3.3. HPLC of AtmS8, AtmS9, and AtmS14-catalyzed reactions .....                            | S4-S5   |
| 3.4. NMR spectra AtmS8 and AtmS9-catalyzed reactions .....                                 | S6-S13  |
| 4. HRMS of AtmS8, AtmS9, CalS9 and AtmS14-catalyzed reactions .....                        | S14-S22 |

## 1. General materials and methods.

**1.1. General materials.** Unless otherwise stated, all general chemicals and reagents were purchased from Sigma-Aldrich (St. Louis, MO, USA) or New England Biolabs (Ipswich, MA, USA). *E. coli* BL21 (DE3) competent cells were purchased from Invitrogen (Carlsbad, CA). The pET-28a *E. coli* expression vector and thrombin were purchased from Novagen (Madison, WI). Primers were purchased from Integrated DNA Technology (Coralville, IA). Pfu DNA polymerase was purchased from Stratagene (La Jolla, CA). Ni-NTA superflow column and gel filtration column HiLoad 16/600 were purchased from GE Healthcare (Piscataway, NJ). Amicon® Ultra centrifugal filter units were purchased from EMD Millipore (Merck, KGaA, Darmstadt, Germany). All other chemicals were reagent grade or better and purchased from Sigma (St. Louis, MO).

## 2. Cloning, expression and purification

**2.1 Cloning and expression:** The sequence of the genes encoding the enzymes involved in this study can be found within the National Center for Biotechnology Information (NCBI): *Actinomadura melliaura atmS8* (genebank accession number ABC02801.1), *atmS9* (genebank accession number ABC02802.1), *atmS14* (genebank accession number ABC02799.1) and *Micromonospora echinospora calS9* (genebank accession number AAM70333.1). Genes *atmS8* and *atmS9* were amplified [using PCR primer sets S8 forward 5'-ATACTGCATATGGTGCGTTTTCTAGGGGACGGCGA-3' and S8 reverse 5'-CAGTATGAATTCTCACCGCCCGATCCCGCGGTAGG-3'; S9 forward 5'-ATACTGCATATGACCGGACGTGTGGTGGTCACGGGC-3' and S9 reverse 5'-CAGTATGAATTCTCATTGGAGCCCGTTTTCCGGCAG-3', respectively) with the AT2433 producer *Actinomadura melliaura* genomic DNA as the template. The *calS9* gene was amplified [using PCR primer sets 5'-AATTCCATATGCCAGATCCCTGGT-3' and reverse 5'-AATTCGAATTCCTACCTGACGACC-3'] with *Micromonospora echinospora* genomic DNA as template. The *atmS14* gene was amplified (using PCR primers S14 forward 5'-ATACTGCATATGCTGAAGCGACCTATCAGCGT-3' and S14 reverse 5'-CAGTATGAATTCTCACCGAGAGTGTCTGCAGGCA-3') from a pUC57-based plasmid template containing a synthesized codon-optimized *atmS14* gene (Genscript, NJ; **Figure S1**) containing NdeI (forward) and EcoRI (reverse) restriction sites. The PCR products were digested with NdeI/EcoRI and ligated into suitably digested pET28a vector to provide expression plasmids for fusion proteins bearing the N-terminal-His<sub>6</sub> affinity purification tag. DNA sequencing was conducted by the University of Wisconsin Biotechnology Center with the primers T7 promoter (5'-TAATACGACTCACTATAGGG) or T7 terminator (5'-GCTAGTTATTGCTCAGCGG). The corresponding His<sub>6</sub>-fusion proteins were overproduced in *E. coli* BL21(DE3) in the presence of 50 µg mL<sup>-1</sup> of kanamycin at 37 °C to an OD<sub>600</sub> of ~0.6, at which point the temperature was lowered to 25 °C and gene expression induced with 0.5 mM IPTG. Cells were allowed to continue to grow at 25 °C for approximately 18 hr at 220 rpm.

**2.2 Protein purification:** The cells were harvested by centrifugation (6,000 xg, 4 °C, 20 min) and resuspended in buffer A (20 mM NaH<sub>2</sub>PO<sub>4</sub>, 300 mM NaCl, 10 mM imidazole, pH 7.8). The cells were lysed via incubation with 1 mg mL<sup>-1</sup> lysozyme (~50,000 U mg<sup>-1</sup>; Sigma-Aldrich, St. Louis, MO, USA) for 30 min on ice followed by sonication (VirSonic 475; Virtis, Gardiner, NY; 100 W, 4 x 30 s pulses, ~1 min between pulses) on ice. Cell debris were removed by centrifugation (10,000 xg at 4 °C for 45 min) and purified via affinity chromatography (5 mL HiTrap Ni-NTA chelating column, GE Healthcare, Piscataway, NJ) using a standard linear gradient (50 mM NaH<sub>2</sub>PO<sub>4</sub>, 300 mM NaCl, pH 8.0 with a linear 10-500 mM imidazole gradient) using an AKTA Purifier 10 (GE Healthcare). Buffer exchange of pooled fractions containing the purified protein was accomplished using a PD-10 column (GE Healthcare) eluted with 25 mM sodium phosphate buffer, pH 7.5. Final purified protein was drop frozen in liquid nitrogen and stored at -80 °C. Protein purity was confirmed by SDS-PAGE and protein concentration was determined using the Bradford Protein Assay Kit (from Bio-Rad, Hercules, CA, USA) using BSA as a standard. Small aliquots of protein were thawed for experiments and used fresh as required.

### 3. Supplementary Figures and Tables.

ATGCTGAAGCGACCTATCAGCGTGCCTGCGAGGTGGACAGTGAGCGCGATCTTCGATTTACGGAAGGCGGCAGCCGCACTGGGACAC  
 GCCGAGCCGGATGACCGCTTCGGCTCTGACGTTGTCGTACCCGGTGACCCCTGATTTCCCGGCTGGTTCCGCGGGCGGCTCCACGAGA  
 ACGTCTTTGACGTACACCGCGTGCCTTCTCGGAATTGTCCGGCTGGGATTTCCATCCGGAGACCGGCAACCTCGCCCACGAGAGCGGC  
 CGCTACTTCTCCGTGGAGGGGCTGGCGGTCCACGCCGGACCCGGCGGAGCGCACCTGTGGTTCGAGCCCATCCTCGACCAGCCGGACAT  
 CGCGATCCTGGGCATCCTGGCCAAGGATTTGACGGCGAGCTGCACTTCTCATGCAGGCCAAGGCCGAGCCGGGCAATCTCAACGGCC  
 TGCAACTGTGCGCCACCGTCCAGGCCACGCCAGCAACTACACCCGCATCCACCGGGGCGGCGGACCCCTACGTCGACTACTTTCGTC  
 GACCGGGCGGCGCCACACCGTGTGGTGGACGTCTACAGTCCGAGCAGGGCGCCTGGTTTCTGCGCAAGCGCAACCGCAACATGATCGT  
 CGAGGTGCACGAGGACGTGCCGGTCTGCCCAACTTCTGCTGGCTCACCCCTGGGGCAGATCCACGACCTGCTGCACACGCCGAACATGA  
 TCAACATGGATGCGCGCACGGTCTGTGCTGCGTTCCCTTCGGTGAGCCGCGGGGCTCCCCTGCCGTCCCCGGGTCCGCGACGACTCC  
 TTCAGGGCGGGCGGTACGCCGCTCGGCCCGCCACACGGACGGCCTGCGCGAGCTGACGAGCTGGCTCACCGAGGCCCGCTGCCGGCACGC  
 GCCGCTCGTCCGCCGCATCCCTTTGCGCGACGTGGACGGCTGGCACCGCACCGAGCAGGAGATCCGGCACCGCGACGGACGGCACTTCA  
 GCGTGTCTGGCGTGGCGGTGACCACGAGCCACCGGGAGGTGCGGTCTGTGGACGCAGCCGCTGCTCGCCCCGGCCGGCACCGGCCTGGCC  
 GGGCTCGTGGTGAGCGAGGTGACGGCGAGTTGCGGCTGTGGTCCGCGCGGATGTACGGCCCGCTACAGCGAAGGCGCCGAGATCGG  
 CCCGACCGTGCAGGATCAGGGCGGTGAGGCGGACGAGCAGGCCCGCTTCCGCCACCTGCTCTTTCGCTCCGGAGACCCGGGTCCGCTACG  
 ACGTGGAGCTGTCCGAAGAGGGCGGCCGCTTCCACCACGCCCGCACCCGCTACCTGATCGCCGAGGTTCGAGCCGGAGGCCCGCGGAG  
 CTCCCCGACGACTACCGGTGGGCGACCACGGGCCAGTTGCAGGCGCTGGTGGCCACCCCGCTACCTGAACATCGAGGCGCGCACGCT  
 GCTCGGCTGCCTGCAGACACTCTGGTGA

**Figure S1.** Codon optimized sequence of AtmS14.

| <b>Table S1.</b> Sugar <sup>1</sup> H and <sup>13</sup> C chemical shift values (in ppm) of <b>2-T</b> , <b>3-T</b> and <b>4-T</b> . |                  |            |                  |
|--------------------------------------------------------------------------------------------------------------------------------------|------------------|------------|------------------|
| <b>Atom</b>                                                                                                                          | <b>2-T</b>       | <b>3-T</b> | <b>4-T</b>       |
| H1', C1'                                                                                                                             | 5.57, 97.2       | 5.60, 99.7 | 5.57, 98.5       |
| H2', C2'                                                                                                                             | 3.49, 74.0       | 3.56, 75.6 | 3.65, 73.28      |
| H3', C3'                                                                                                                             | 3.76, 75.3       | 3.76, 75.0 | 3.80, 75.0       |
| H4', C4'                                                                                                                             | 3.44, 71.5       | 3.49, 77.6 | NA               |
| H5a', H5b', C5'                                                                                                                      | 3.87, 75.5       | 4.11, 77.5 | 3.91, 3.55, 67.9 |
| H6a', H6b', C6'                                                                                                                      | 3.83, 3.77, 62.3 | NA         | NA               |

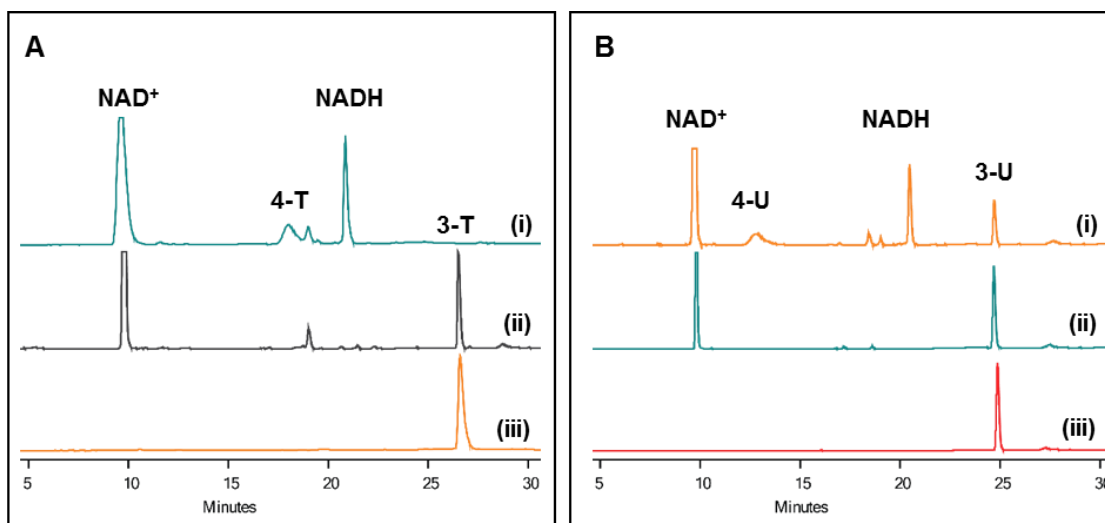

**Figure S2.** HPLC chromatograms of AtmS9-catalyzed reactions with **3-T (A)** and **3-U (B)** as substrates: **(i)** full reaction (2 mM **3-T** or **3-U**, 6 mM NAD<sup>+</sup>, 15  $\mu$ M AtmS9, 1 mM MgCl<sub>2</sub>, 1 mM DTT in 50 mM NaH<sub>2</sub>PO<sub>4</sub> buffer, pH 7.5 at 30 °C for 16 h); **(ii)** **3-T** or **3-U** (2 mM) and NAD<sup>+</sup> (6 mM) standard mixture; and **(iii)** **3-T** or **3-U** standard (2 mM).

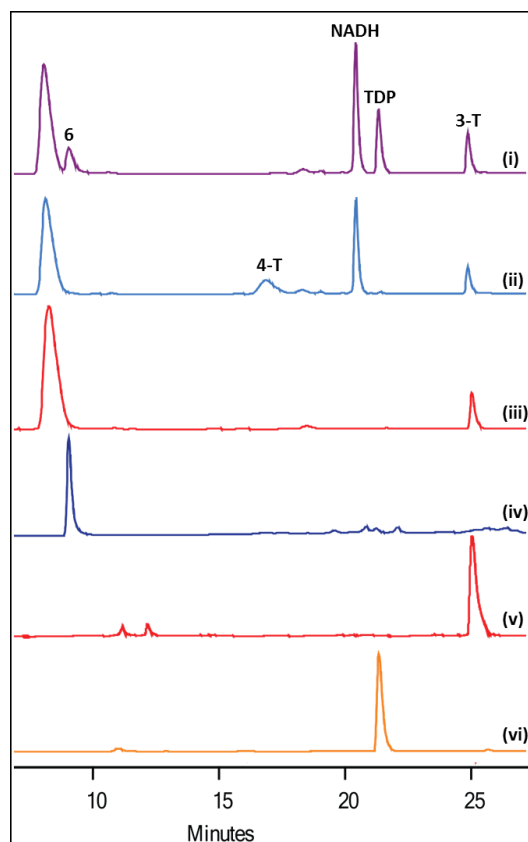

**Figure S3.** HPLC chromatograms the AtmS9/AtmS14-coupled reaction involving: (i) full reaction containing 2 mM **3-T**, 6 mM NAD<sup>+</sup>, 15 μM AtmS9, 24 μM AtmS14 in 1 mM MgCl<sub>2</sub>, 1 mM DTT in 50 mM NaH<sub>2</sub>PO<sub>4</sub> buffer, pH 7.5 at 30 °C for 15 h; (ii) AtmS9 reaction in 2 mM **3-T**, 6 mM NAD<sup>+</sup>, 15 μM AtmS9, 1 mM MgCl<sub>2</sub>, 1 mM DTT in 50 mM NaH<sub>2</sub>PO<sub>4</sub> buffer, pH 7.5 at 30 °C for 15 h; (iii) **3-T** (2 mM) and NAD<sup>+</sup> (6 mM) standard mixture; (iv) **6** standard (2 mM); (v) **3-T** standard (2 mM); and (vi) TDP standard (2 mM).

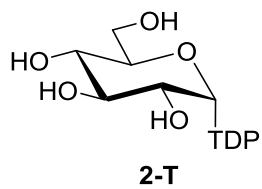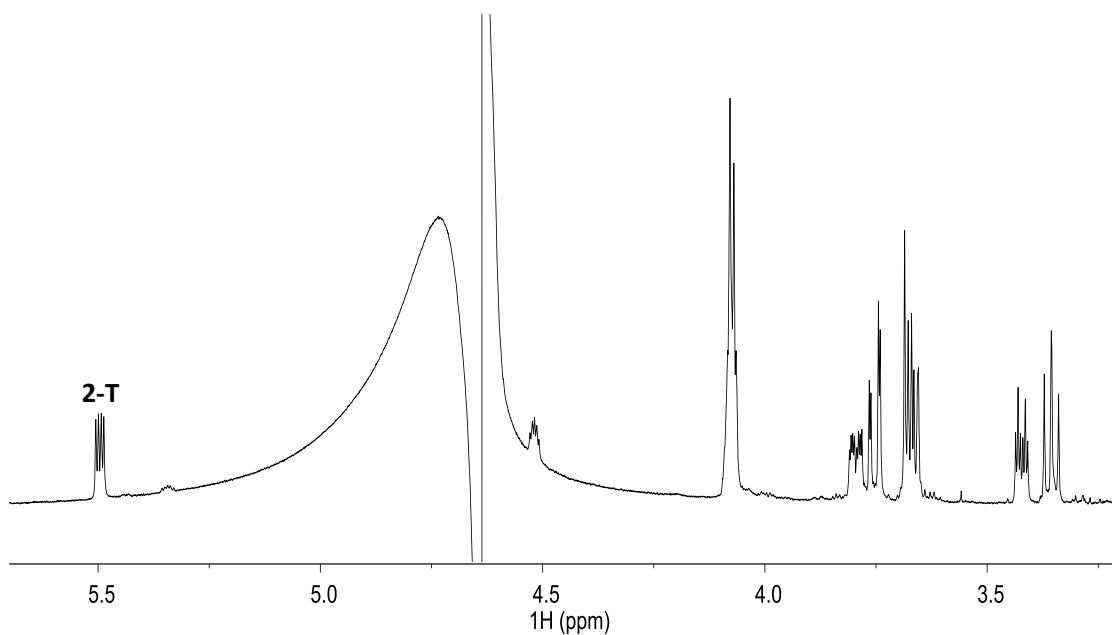

**Figure S4.** 1D- $^1\text{H}$  NMR displaying key sugar resonances of a 2 mM **2-T** standard in 1 mM  $\text{MgCl}_2$ , 1 mM DTT in 50 mM  $\text{NaH}_2\text{PO}_4$  buffer, pH 7.5 at 30 °C, where the **2-T** anomeric proton signal is labeled.

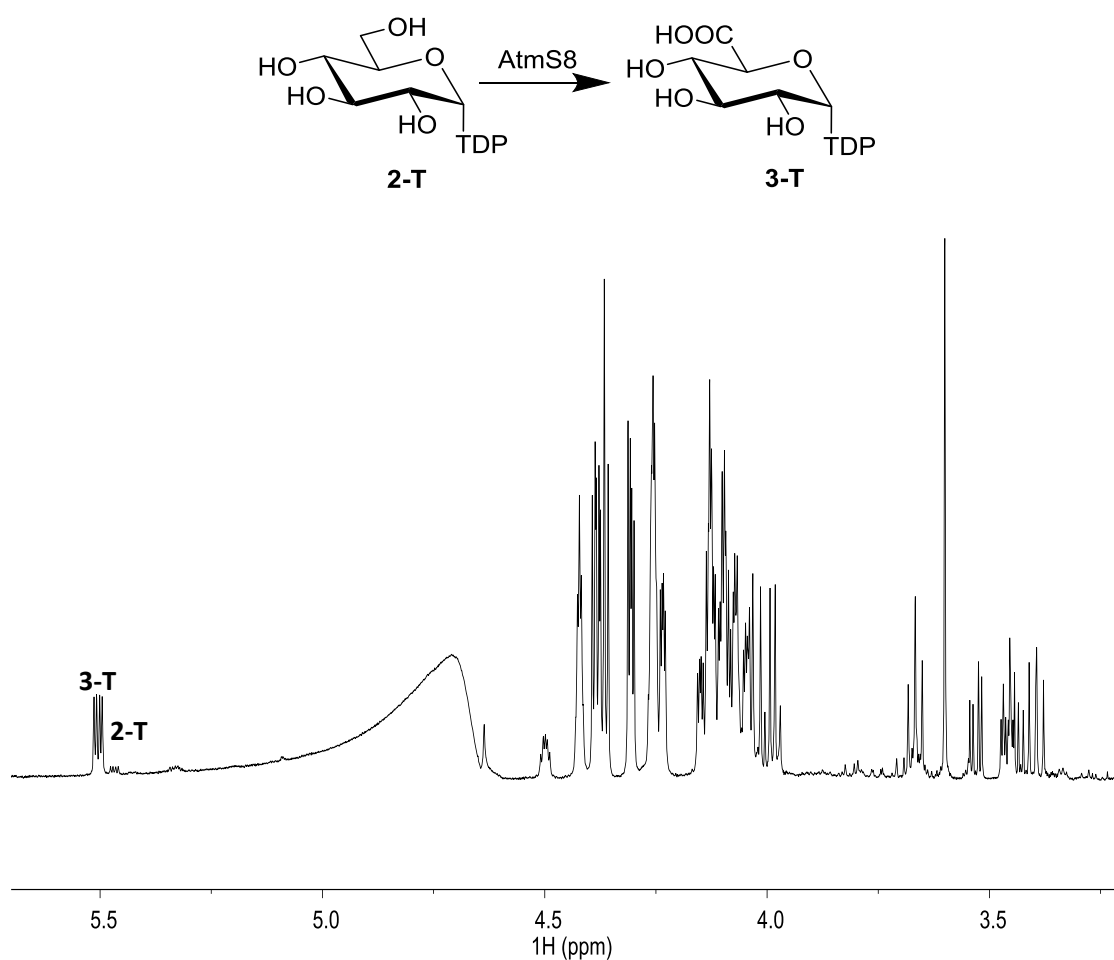

**Figure S5.** 1D-<sup>1</sup>H NMR displaying key sugar resonances of a reaction containing 2 mM **2-T**, 6 mM NAD<sup>+</sup>, 10 μM AtmS8 in 1 mM MgCl<sub>2</sub>, 1 mM DTT in 50 mM NaH<sub>2</sub>PO<sub>4</sub> buffer, pH 7.5 at 30 °C after 16 h where anomeric proton signals of **2-T** and **3-T** are labeled.

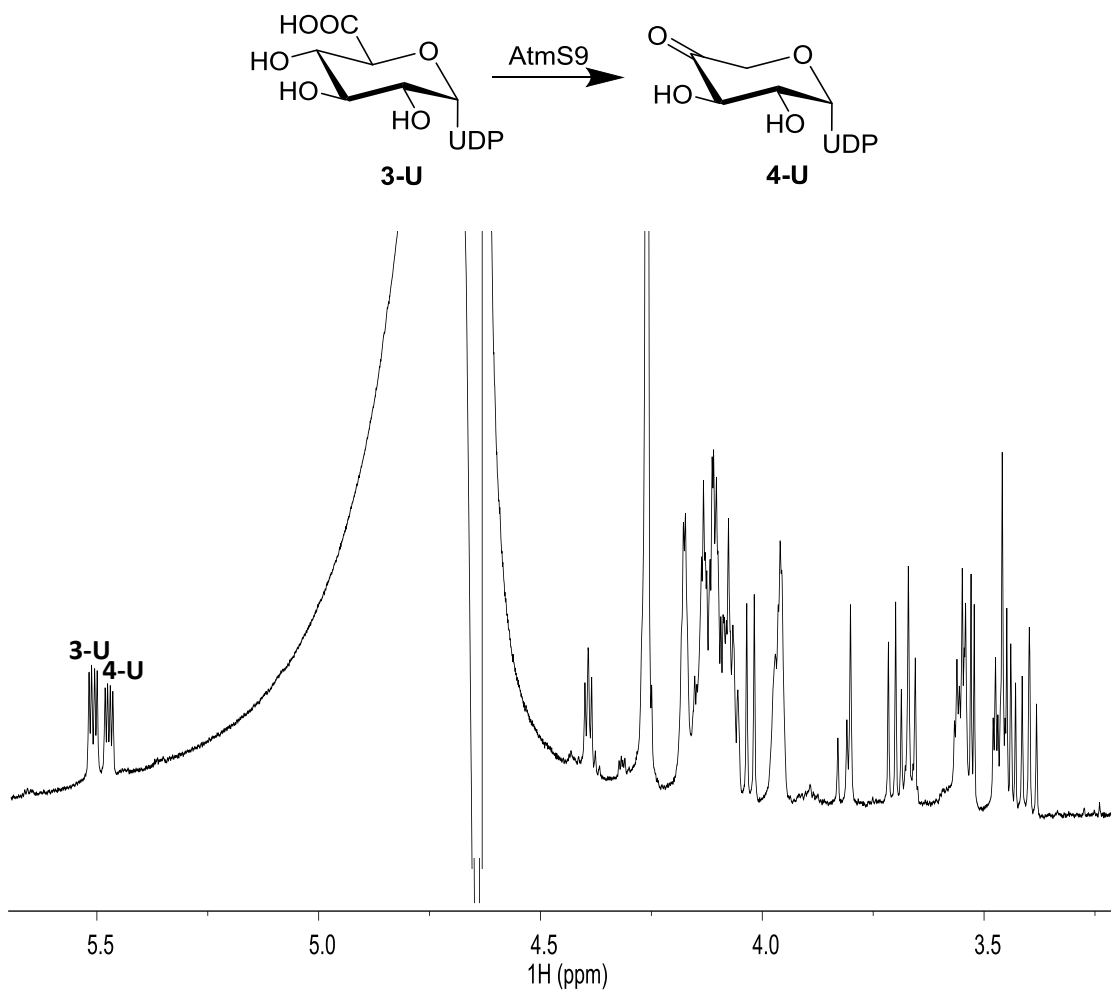

**Figure S6.** 1D- $^1\text{H}$  NMR displaying key sugar resonances of an AtmS9-catalyzed reaction containing  $\sim 2$  mM **3-U** from AtmS8 coupled reaction [2 mM **2-U**, 6 mM  $\text{NAD}^+$ , 10  $\mu\text{M}$  AtmS8 1 mM  $\text{MgCl}_2$ , 1 mM DTT in 50 mM  $\text{NaH}_2\text{PO}_4$  buffer, pH 7.5 at 30  $^\circ\text{C}$  for 20 h] and 15  $\mu\text{M}$  AtmS9 after 4.5 h where the anomeric protons of **3-U** and **4-U** are labeled.



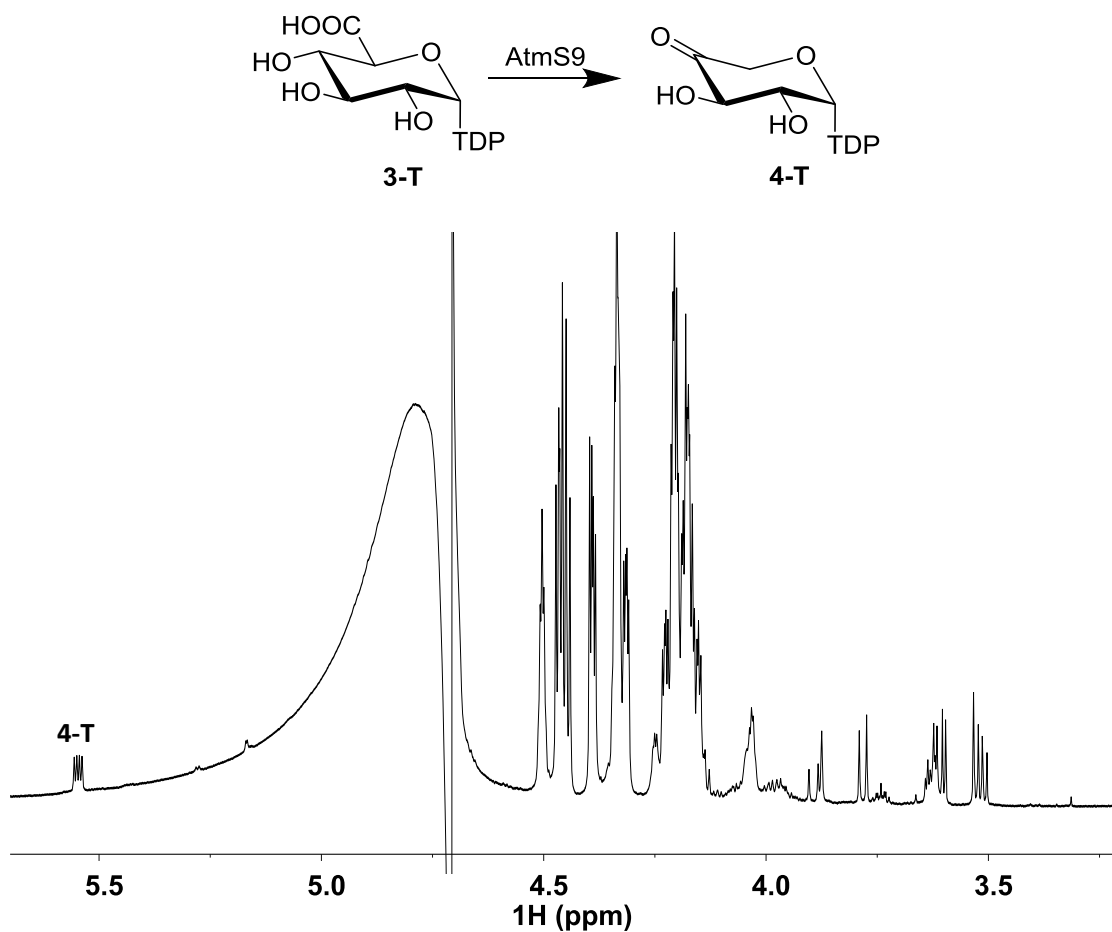

**Figure S7.** 1D-<sup>1</sup>H NMR displaying key sugar resonances of an AtmS9-catalyzed reaction containing ~2 mM **3-T** from an AtmS8 coupled reaction [2 mM **2-T**, 6 mM NAD<sup>+</sup>, 10 μM AtmS8 1 mM MgCl<sub>2</sub>, 1 mM DTT in 50 mM NaH<sub>2</sub>PO<sub>4</sub> buffer, pH 7.5 at 30 °C for 20 h] and 15 μM AtmS9 after 15 h where the anomeric proton of **4-T** is labeled.

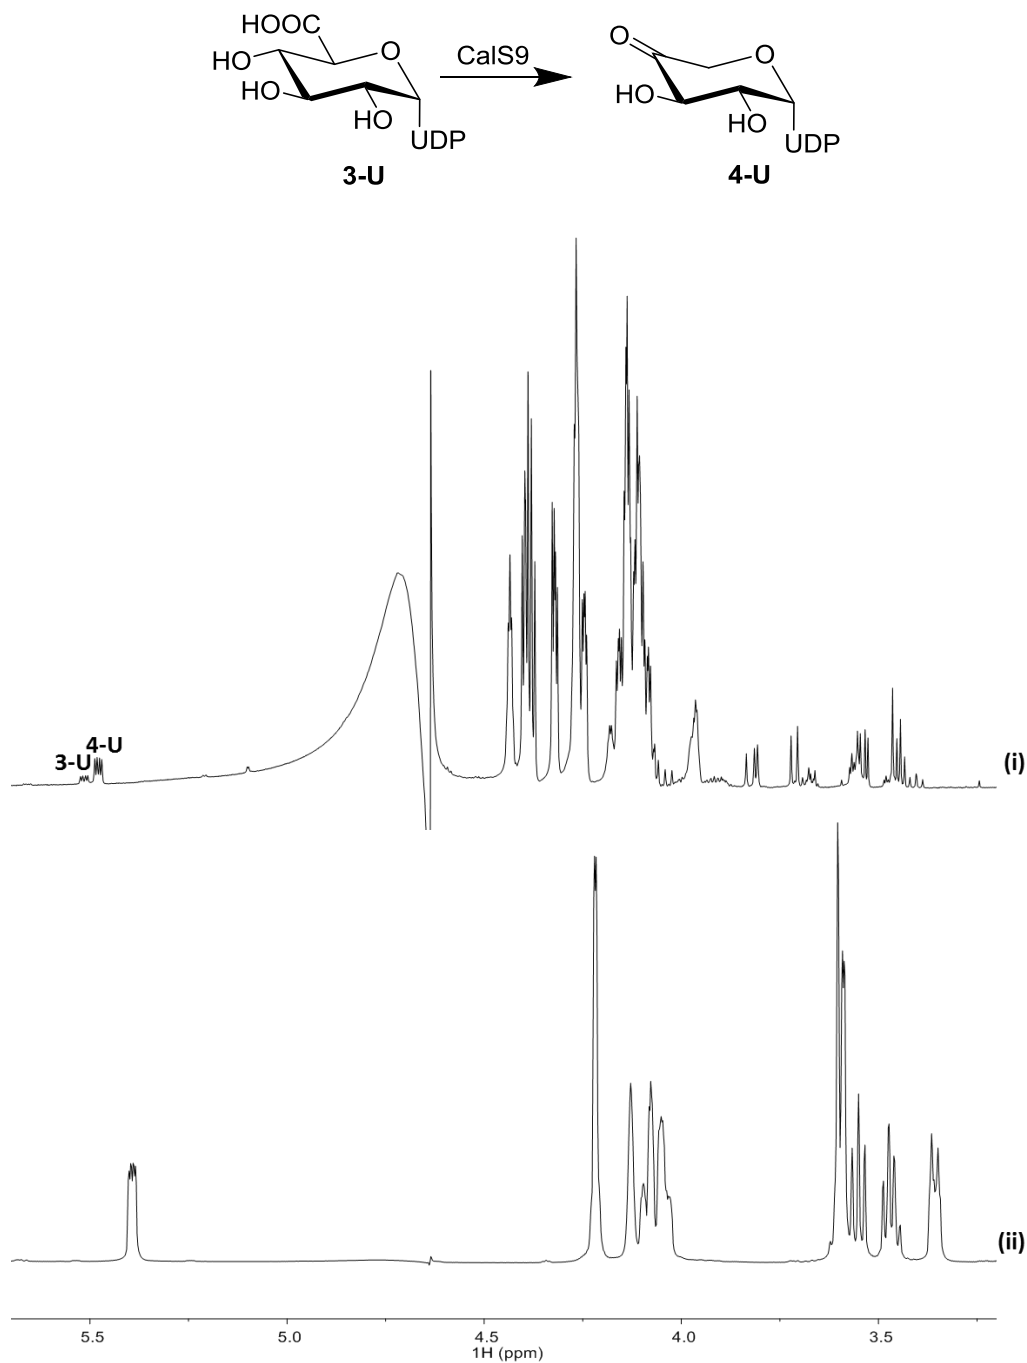

**Figure S8.** 1D-<sup>1</sup>H NMR spectra displaying key sugar resonances of (i) a CalS9-catalyzed reaction containing 2 mM **3-U**, 6 mM NAD<sup>+</sup>, 15 μM CalS9, 1 mM MgCl<sub>2</sub>, 1 mM DTT in 50 mM NaH<sub>2</sub>PO<sub>4</sub> buffer, pH 7.5 at 30 °C and 12 h where the anomeric signals of **3-U** and **4-U** are labeled; and (ii) standard UDP-xylose.

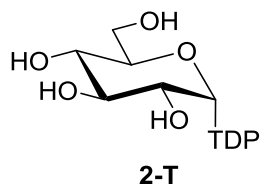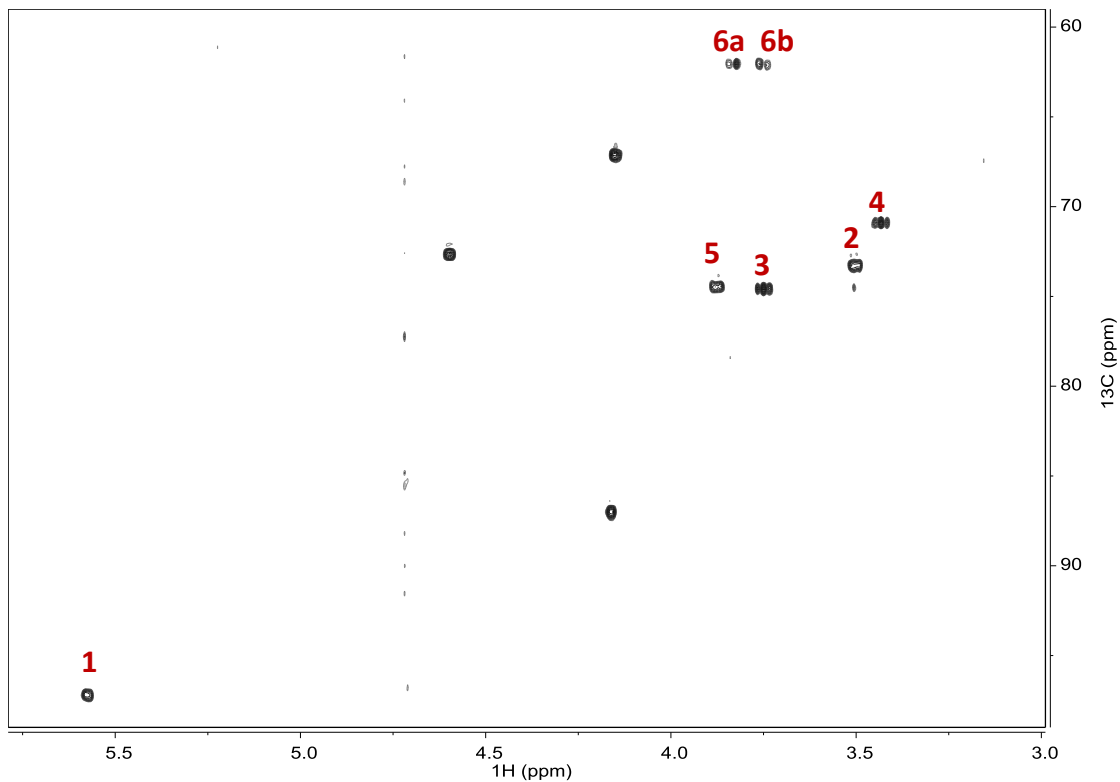

**Figure S9.** 2D-<sup>1</sup>H-<sup>13</sup>C HSQC spectra displaying key sugar resonances of a 2 mM **2-T** standard in 1 mM MgCl<sub>2</sub>, 1 mM DTT in 50 mM NaH<sub>2</sub>PO<sub>4</sub> buffer, pH 7.5 at 30 °C where the sugar resonances of **2-T** are labeled.

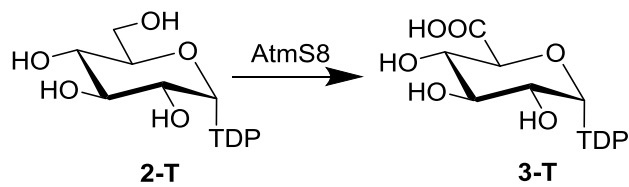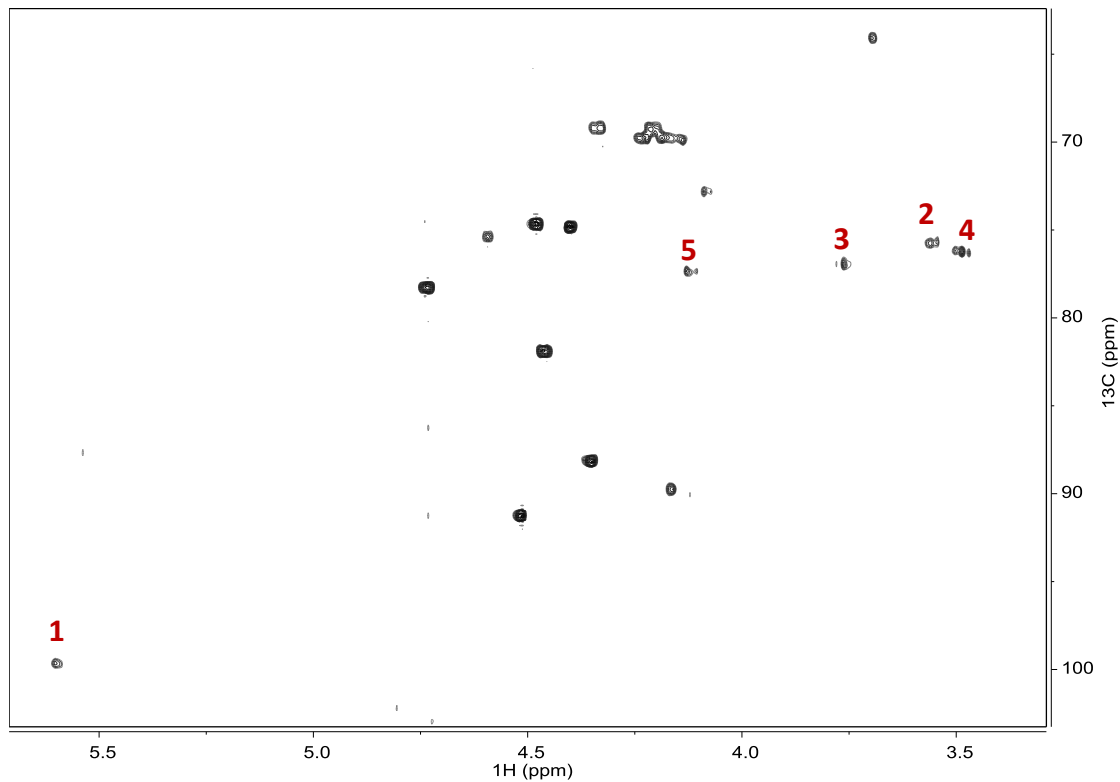

**Figure S10.** 2D- $^1\text{H}$ - $^{13}\text{C}$  HSQC spectra displaying key sugar  $^1\text{H}$ - $^{13}\text{C}$  correlations of an AtmS8-catalyzed reaction containing 2 mM **2-T**, 6 mM  $\text{NAD}^+$ , 10  $\mu\text{M}$  AtmS8 in 1 mM  $\text{MgCl}_2$ , 1 mM DTT in 50 mM  $\text{NaH}_2\text{PO}_4$  buffer, pH 7.5 at 30  $^\circ\text{C}$  after 16 h where the sugar resonances of **3-T** are labeled.

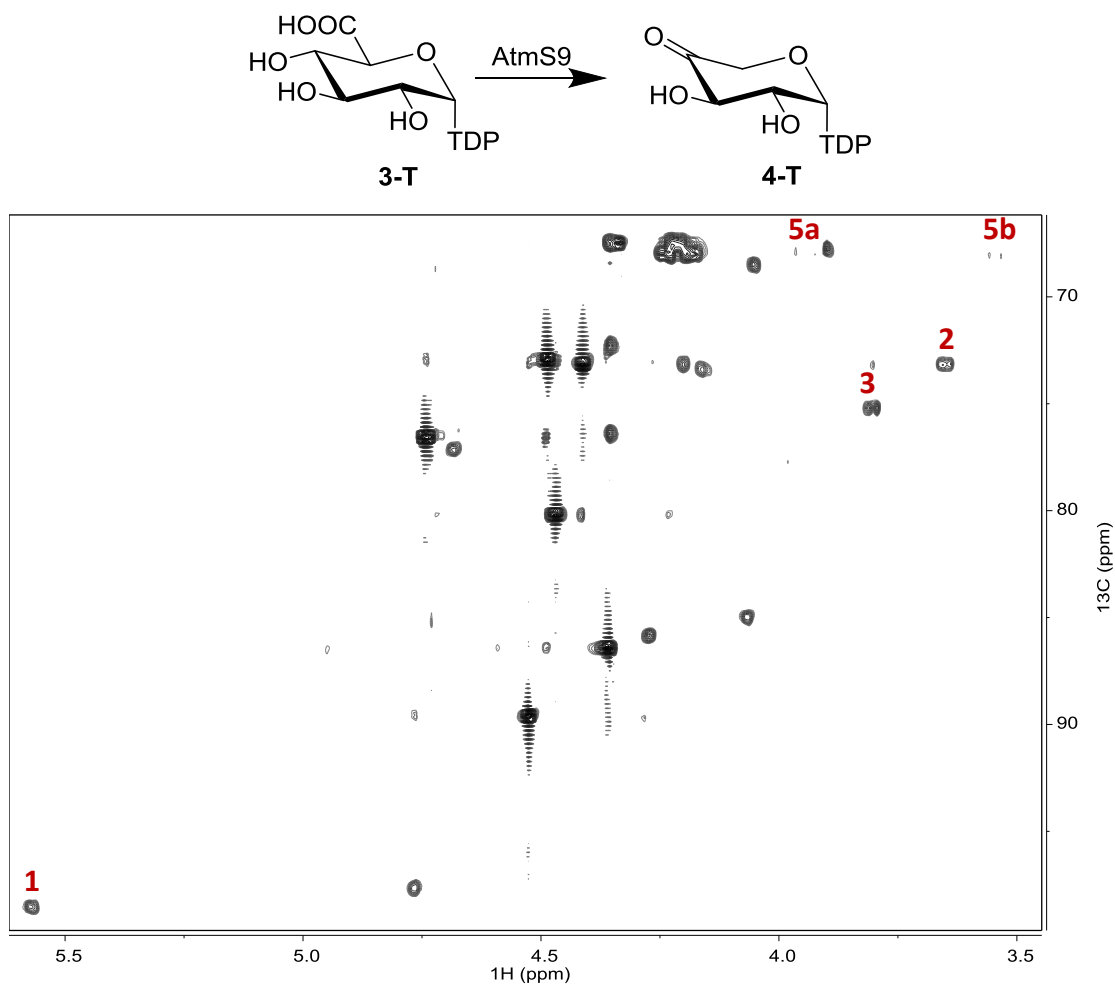

**Figure S11.** 2D-<sup>1</sup>H-<sup>13</sup>C HSQC spectra displaying key sugar resonances of an AtmS9-catalyzed reaction (containing ~70% D<sub>2</sub>O) starting from ~2 mM **3-T** from an AtmS8-catalyzed coupled reaction [2 mM **2-T**, 6 mM NAD<sup>+</sup>, 10 μM AtmS8 in 1 mM MgCl<sub>2</sub>, 1 mM DTT in 50 mM NaH<sub>2</sub>PO<sub>4</sub> buffer, pH 7.5 at 30 °C for 16 h] and 15 μM AtmS9 after 15 h with the sugar resonances of **4-T** labeled. The weak intensities of 5a and 5b are attributed to deuterium incorporation from the solvent during the reaction.

#### 4. HRMS of AtmS8, AtmS9, CalS9 and AtmS14-catalyzed reactions.

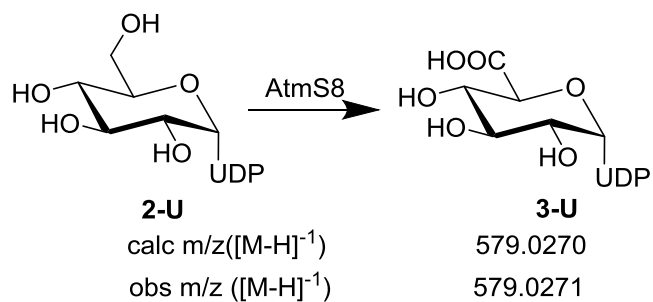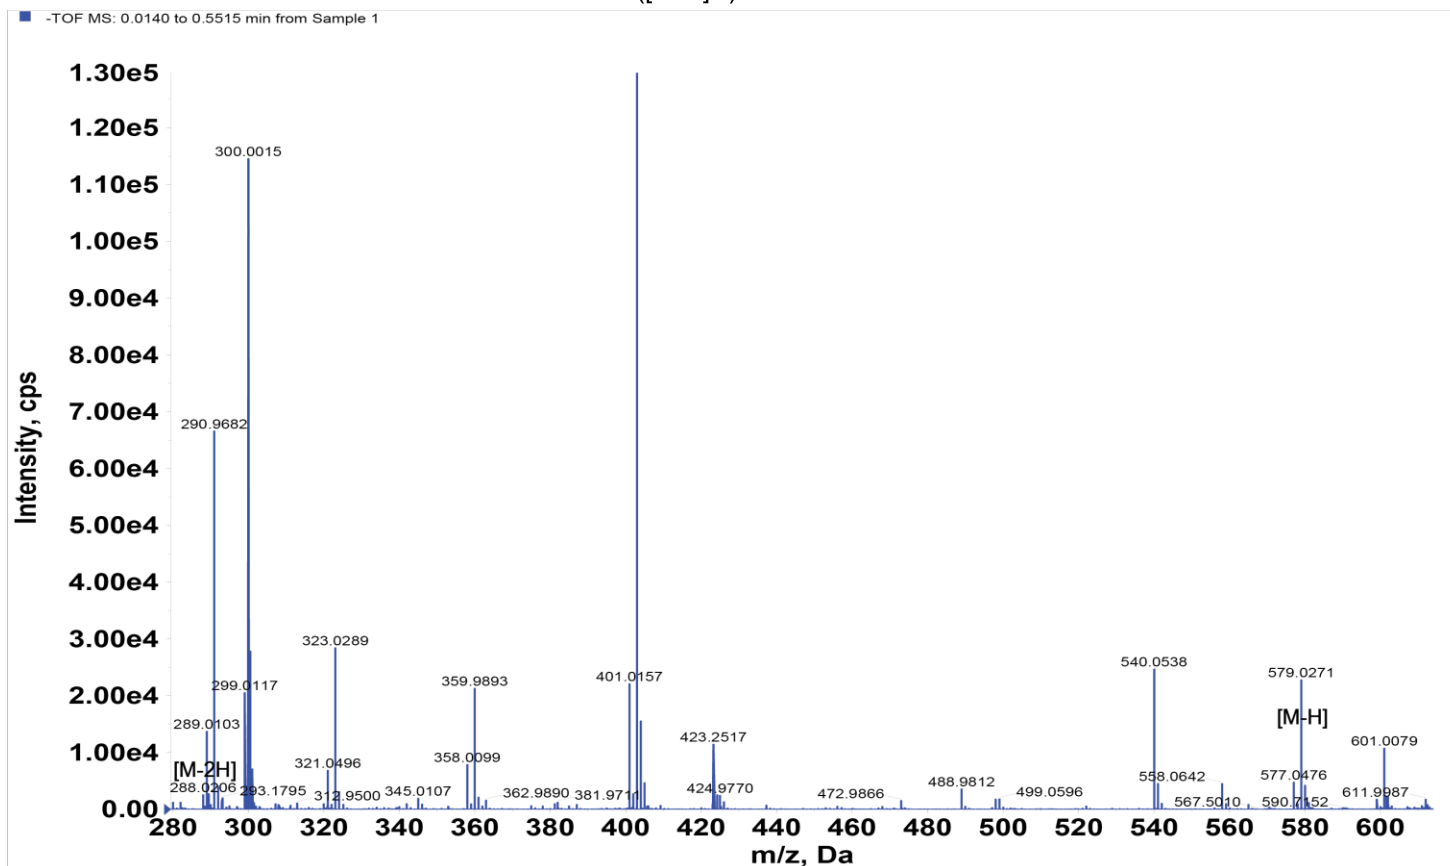

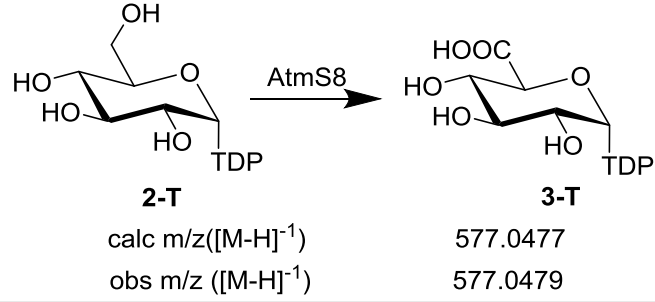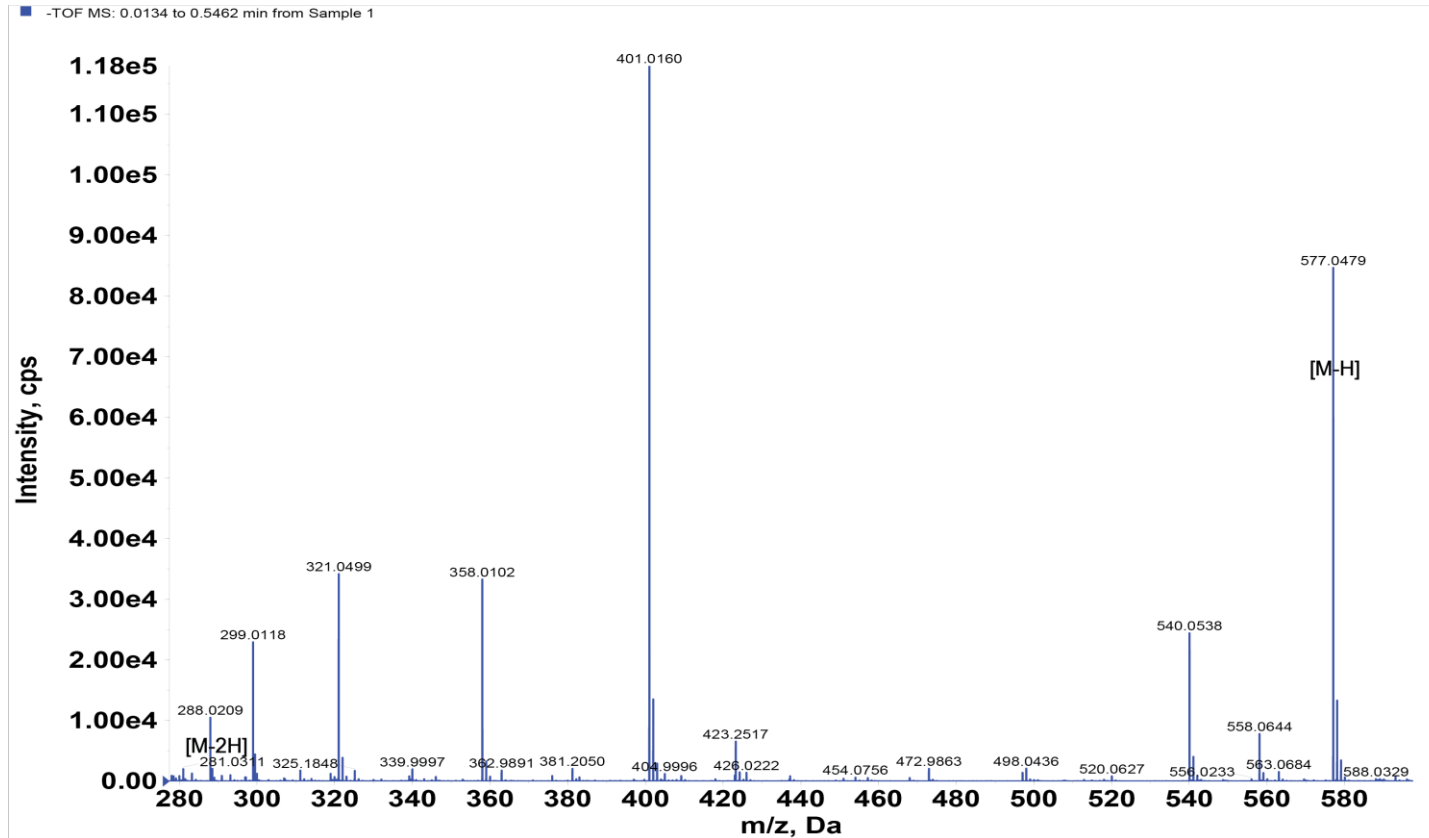

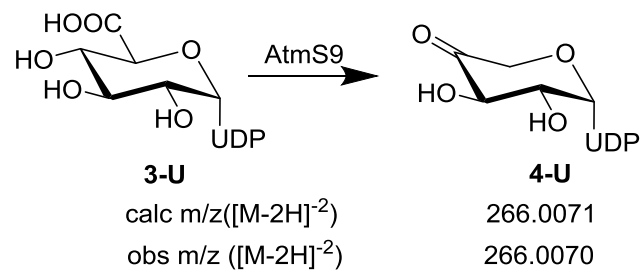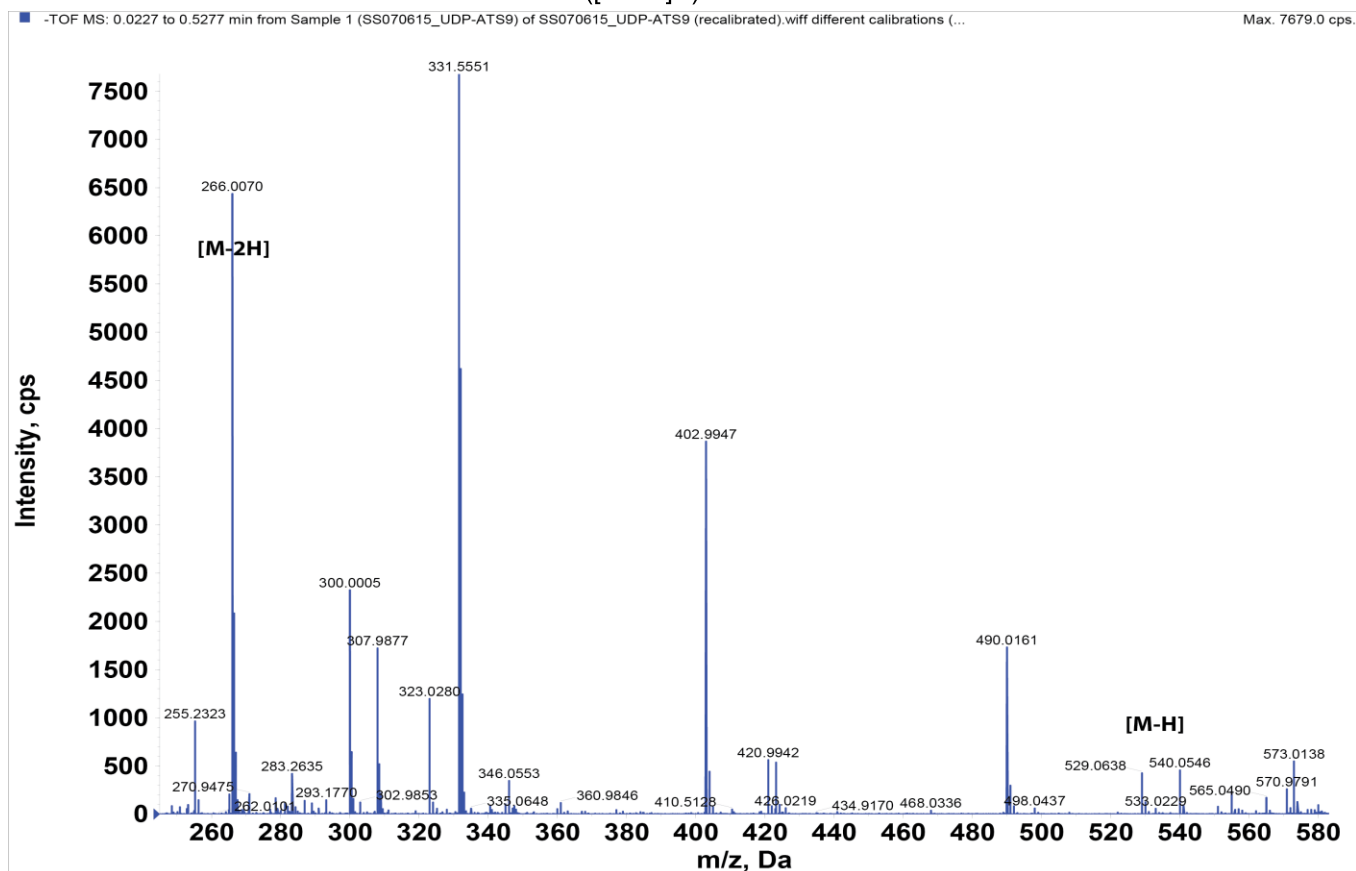



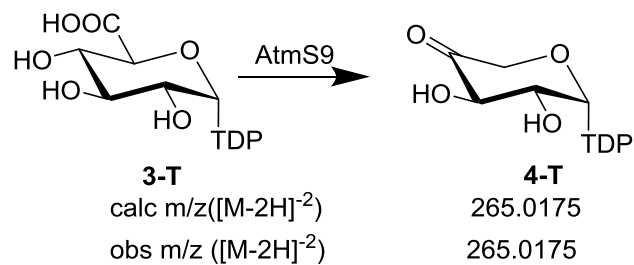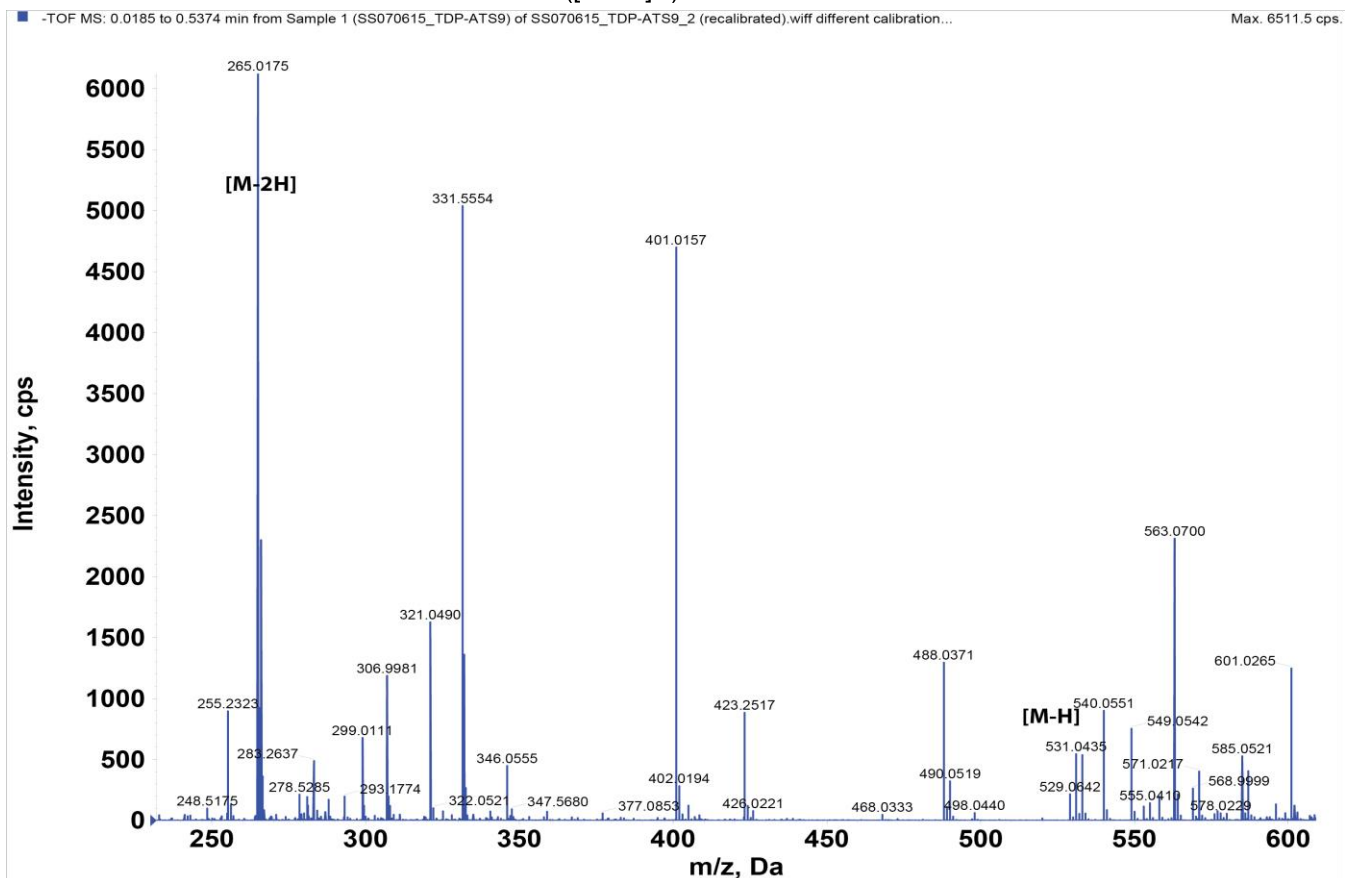

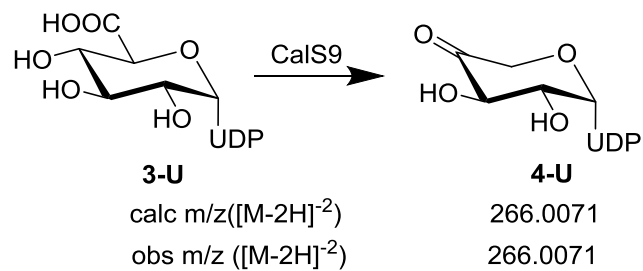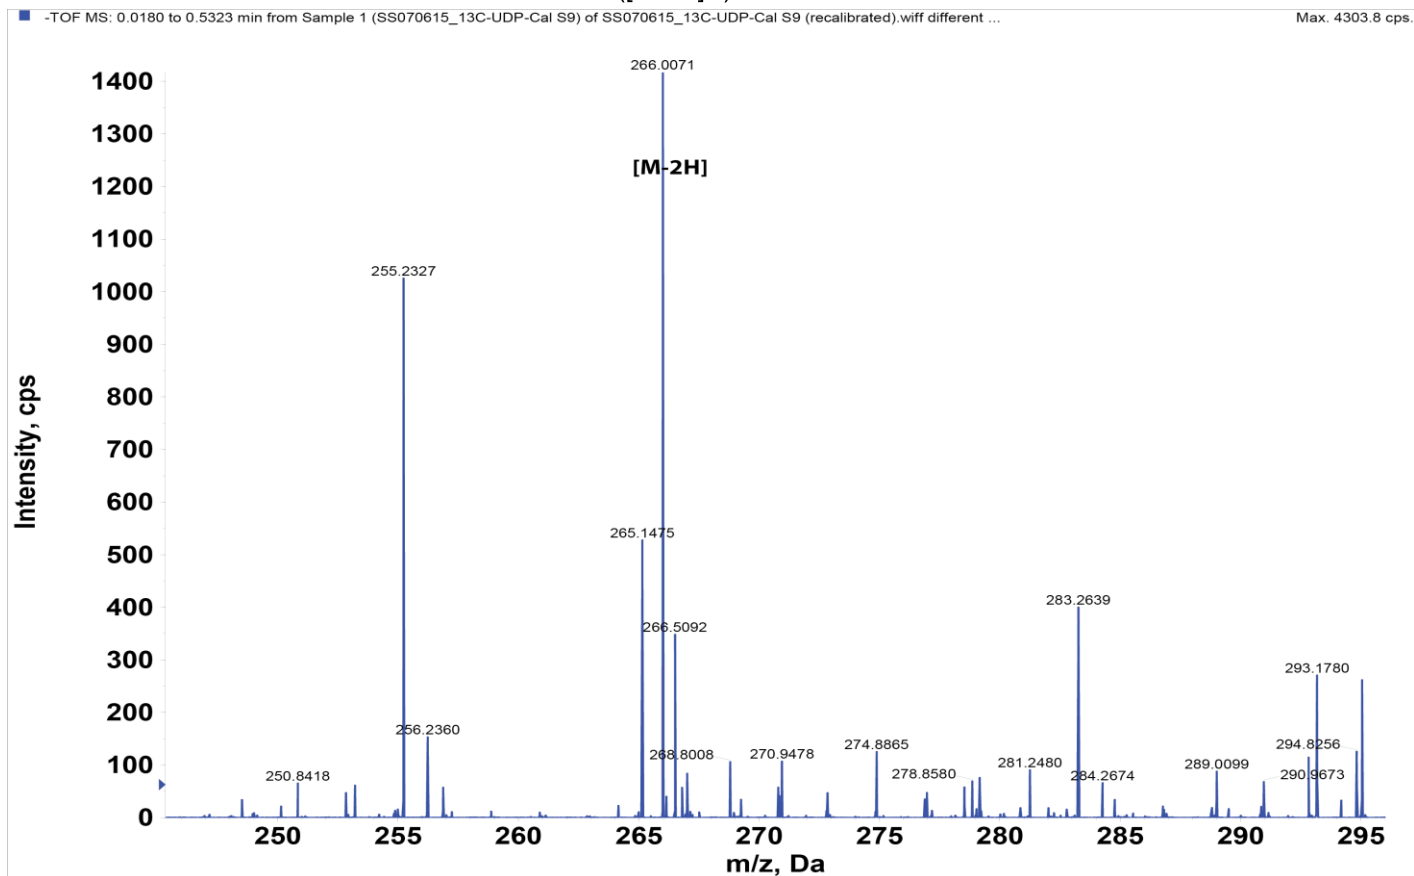

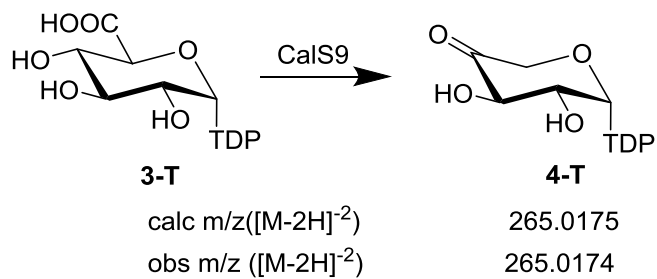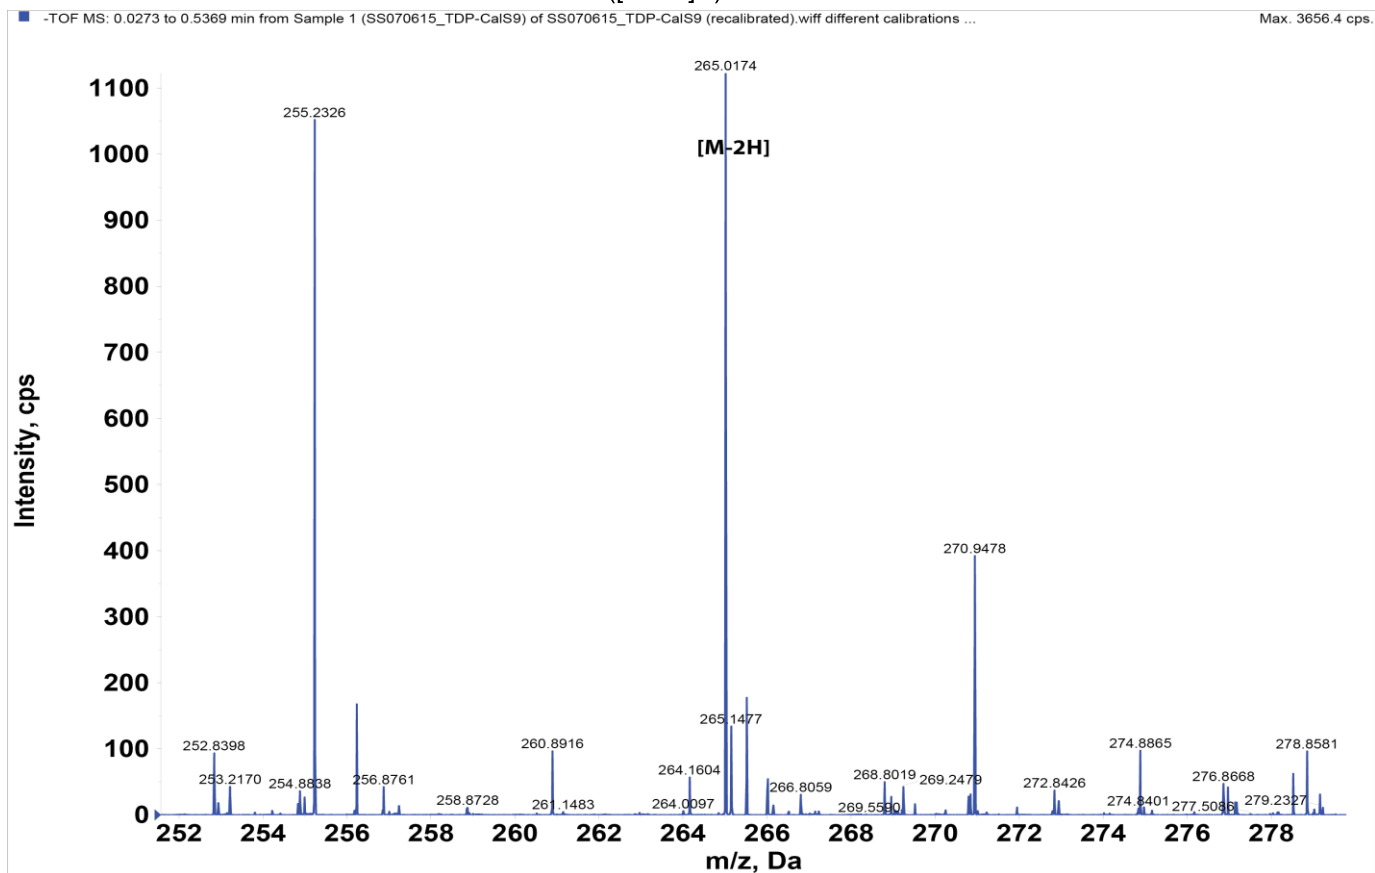

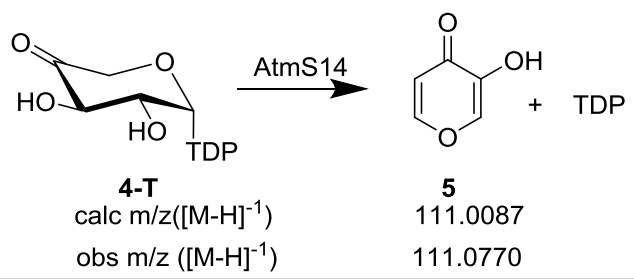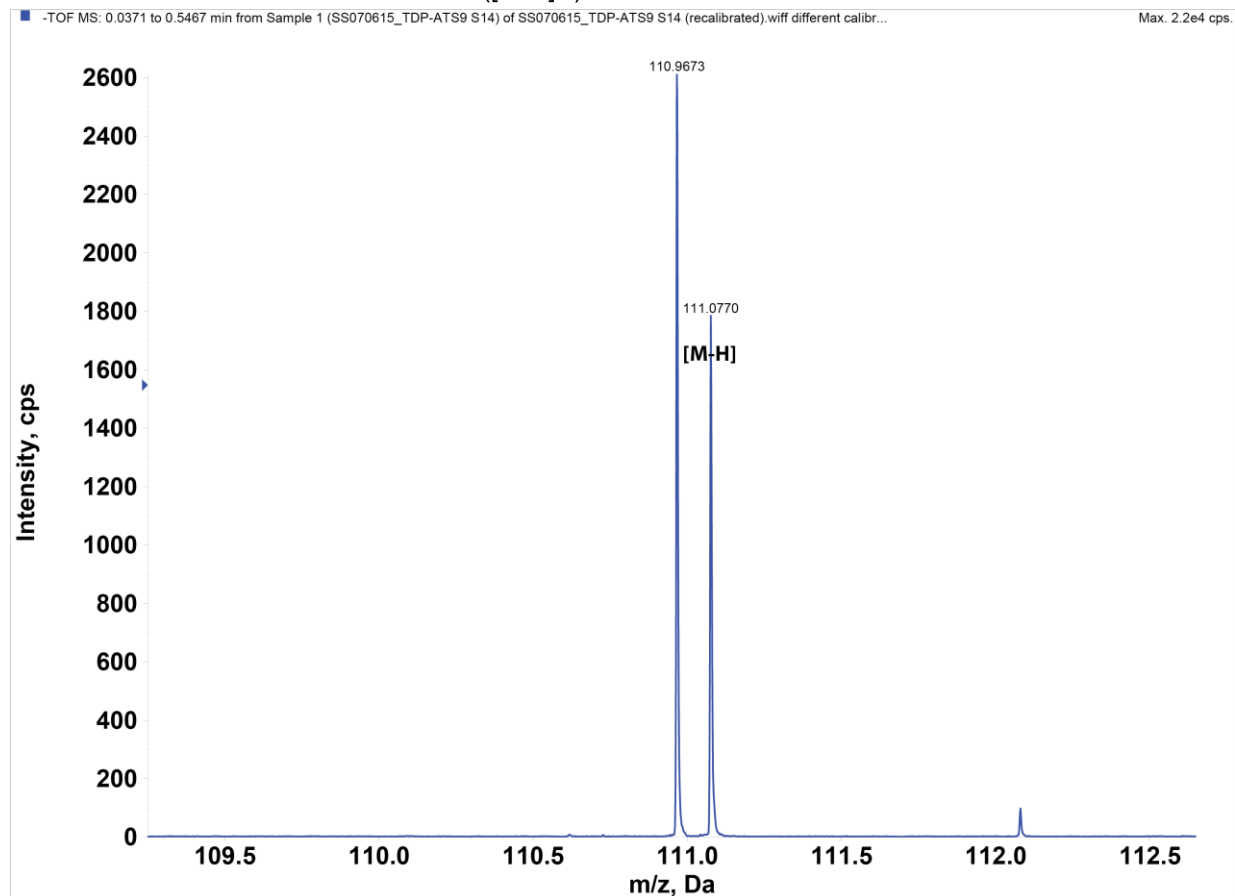

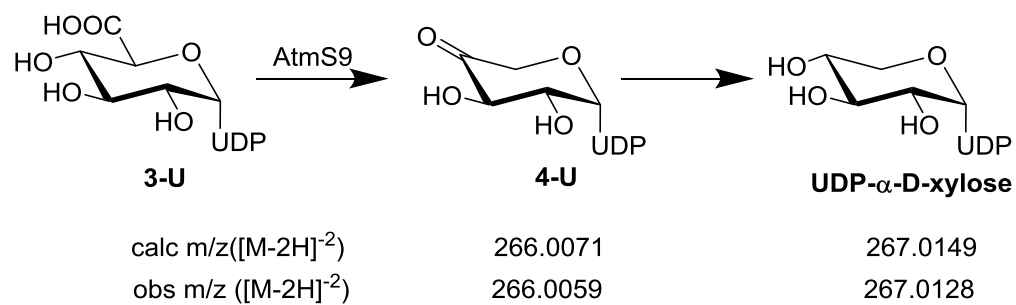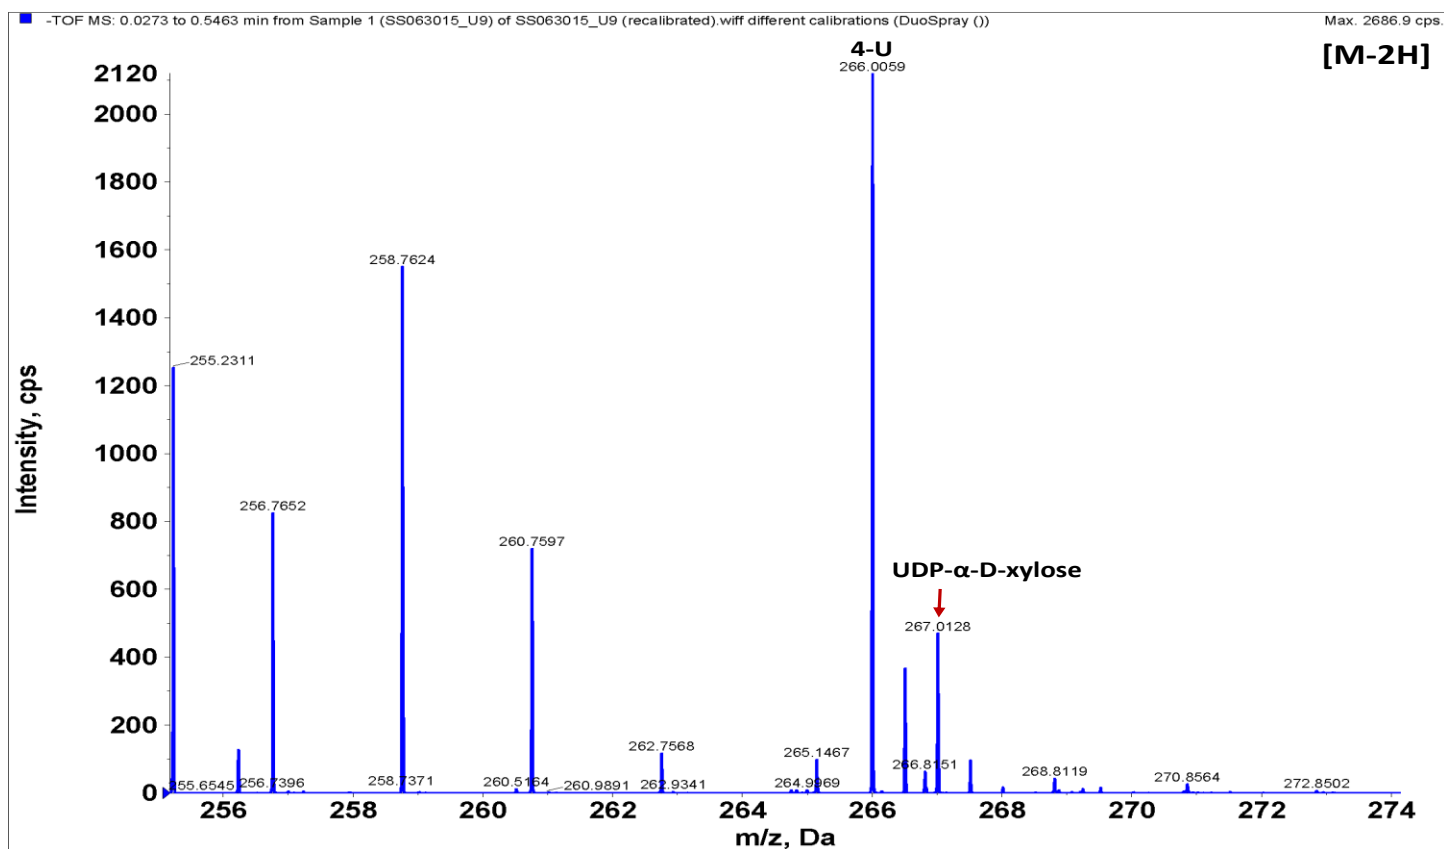

Supplement: NIHMS719604-supplement-supplemental_information.pdf [file NIHMS719604-supplement-supplemental_information.pdf]
